# Supplementary material for: 13C CPMAS NMR as an Alternative Method to Verify the Quality of Dietary Supplements Containing Curcumin
Source: MDPI journal article supplement (doi:10.3390/molecules28083442), 2023-04-13
Supplement: s1 [file s1]

**Table S1.** Crystallographic structures of curcumin deposited in The Cambridge Structural Database (CSD).

| Ref. code      | Group                   | Form       | a [Å]         | b [Å]        | c [Å]         | $\alpha$ [°] | $\beta$ [°]  | $\gamma$ [°] | Volume [Å <sup>3</sup> ] | Z        | Z'       | Temp [°C]  |
|----------------|-------------------------|------------|---------------|--------------|---------------|--------------|--------------|--------------|--------------------------|----------|----------|------------|
| BINMEQ         | P2/n                    | I          | 20.028        | 7.073        | 12.609        | 90           | 94.94        | 90           | 1779.53                  | 4        | 1        | 121        |
| BINMEQ1        | P2/n                    | I          | 12.688        | 7.206        | 19.897        | 90           | 95..28       | 90           | 1811.48                  | 4        | 1        | 283-303    |
| BINMEQ2        | P2/n                    | I          | 12.707        | 7.219        | 19.880        | 90           | 95.35        | 90           | 1815.59                  | 4        | 1        | 283-303    |
| BINMEQ3        | P2/n                    | I          | 12.695        | 7.207        | 19.960        | 90           | 95.10        | 90           | 1819.10                  | 4        | 1        | 283-303    |
| BINMEQ4        | P2/n                    | I          | 12.584        | 7.039        | 19.951        | 90           | 95.04        | 90           | 1760.49                  | 4        | 1        | 90         |
| <b>BINMEQ5</b> | <b>P2/n</b>             | <b>I</b>   | <b>12.568</b> | <b>7.042</b> | <b>19.958</b> | <b>90</b>    | <b>94.99</b> | <b>90</b>    | <b>1759.76</b>           | <b>4</b> | <b>1</b> | <b>100</b> |
| <b>BINMEQ6</b> | <b>Pca2<sub>1</sub></b> | <b>II</b>  | <b>35.417</b> | <b>7.779</b> | <b>12.648</b> | <b>90</b>    | <b>90</b>    | <b>90</b>    | <b>3484.78</b>           | <b>8</b> | <b>2</b> | <b>100</b> |
| <b>BINMEQ7</b> | <b>Pbca</b>             | <b>III</b> | <b>12.536</b> | <b>7.992</b> | <b>34.462</b> | <b>90</b>    | <b>90</b>    | <b>90</b>    | <b>3452.50</b>           | <b>8</b> | <b>1</b> | <b>100</b> |
| BINMEQ8        | Pca2 <sub>1</sub>       | II         | 35.537        | 7.780        | 12.680        | 90           | 90           | 90           | 3505.56                  | 8        | 2        | 283-303    |
| BINMEQ9        | P2/n                    | I          | 12.697        | 7.198        | 19.953        | 90           | 95.12        | 90           | 1816.36                  | 4        | 1        | 283-303    |
| BINMEQ10       | P2/n                    | I          | 12.685        | 7.184        | 19.895        | 90           | 95.22        | 90           | 1805.71                  | 4        | 1        | 283-303    |
| BINMEQ11       | P2/n                    | I          | 12.626        | 7.110        | 19.956        | 90           | 95.08        | 90           | 1784.50                  | 4        | 1        | 173        |
| BINMEQ12       | Pca2 <sub>1</sub>       | II         | 35.446        | 7.850        | 19.693        | 90           | 90           | 90           | 3531.70                  | 8        | 2        | 173        |
| BINMEQ13       | P2/n                    | I          | 12.683        | 7.177        | 19.916        | 90           | 95.05        | 90           | 1805.63                  | 4        | 1        | 283-303    |
| BINMEQ14       | P2/n                    | I          | 12.695        | 7.209        | 19.936        | 90           | 95.28        | 90           | 1816.96                  | 4        | 1        | 283-303    |
